# Supplementary material
Source: publisher site journal article supplement (doi:10.3762/bjoc.4.7)
Supplement: Additional file 1 [file 1860-5397-4-7-S1.pdf]

# Unexpected degradation of bisphosphonate P-C-P bridge under mild conditions

Petri A. Turhanen\* and Jouko J. Vepsäläinen

*University of Kuopio, Department of Biosciences, Laboratory of Chemistry, P.O. Box 1627, FIN-70211, Kuopio, Finland.*

## Table of Contents

|                                                                                                                          |            |
|--------------------------------------------------------------------------------------------------------------------------|------------|
| <b>General experimental details</b>                                                                                      | <b>S2</b>  |
| <b>Procedure for the preparation of etidronate derivative 1a</b>                                                         | <b>S2</b>  |
| <b><sup>1</sup>H, <sup>13</sup>C and <sup>31</sup>P NMR identification data for compound 1a</b>                          | <b>S2</b>  |
| <b>Typical example of 1a degradation experiment</b>                                                                      | <b>S2</b>  |
| <b>Typical example of 1b degradation experiment</b>                                                                      | <b>S2</b>  |
| <b>Typical example of 1b degradation experiment in triethyl amine</b>                                                    | <b>S3</b>  |
| <b><sup>1</sup>H NMR spectra of compound 1a</b>                                                                          | <b>S4</b>  |
| <b><sup>31</sup>P NMR spectra of compound 1a</b>                                                                         | <b>S5</b>  |
| <b><sup>13</sup>C NMR spectra with broadens of compound 1a</b>                                                           | <b>S6</b>  |
| <b>Typical examples of <sup>1</sup>H and <sup>31</sup>P NMR spectra of 1a decomposition experiment</b>                   | <b>S12</b> |
| <b>Typical examples of <sup>1</sup>H and <sup>31</sup>P NMR spectra of 1b decomposition experiment</b>                   | <b>S14</b> |
| <b>Typical examples of <sup>1</sup>H and <sup>31</sup>P NMR spectra of 1b decomposition experiment in triethyl amine</b> | <b>S16</b> |

**General experimental details:**  $^1\text{H}$ ,  $^{31}\text{P}$  and  $^{13}\text{C}$  NMR spectra were recorded on a Bruker Avance 500 spectrometer operating at 500.1, 202.5 and 125.8 MHz, respectively. TMS or TSP (for  $\text{D}_2\text{O}$  solutions) was used as an internal standard for  $^1\text{H}$  and  $^{13}\text{C}$  measurements, and 85%  $\text{H}_3\text{PO}_4$  was used as an external standard for  $^{31}\text{P}$  measurements. The  $^3J_{\text{HH}}$  couplings are indicated by the letter “*J*”. The  $^nJ_{\text{HP}}$  couplings were calculated from proton spectra and all *J* values are given in Hz. The  $^nJ_{\text{CP}}$  couplings were calculated from proton decoupled carbon spectra with the coupling constants given in parenthesis as hertz. The purity of the compound **1a** was determined from  $^1\text{H}$  and  $^{31}\text{P}$  NMR spectra and was ca. 96 %. Electrospray ionization mass spectra were acquired by an LCQ quadrupole ion trap mass spectrometer with an electrospray ionization source.

**Procedure for the preparation of etidronate derivative 1a:** Acetylated etidronic acid (**5**) (150 mg, 0.60 mmol),  $\text{Na}_2\text{CO}_3$  (388 mg, 3.66 mmol) and ethyl chloroformate (3 ml) was refluxed for overnight under the nitrogen atmosphere. Reaction mixture was evaporated to dryness, diethyl ether (8 ml) was added and reaction mixture was stirred for 15 minutes before the precipitate was removed by centrifugation. The remaining solution was evaporated to dryness and compound **1a** was obtained as colorless oil in 55% yield.

**[1-(diethoxycarbonyloxy)phosphoryl-1-acetyloxyethyl]-1-(ethoxycarbonyloxy)phosphonic acid ethyl ester (1a):** Pair of diastereomers (ratio 50:50).  $^1\text{H}$  NMR ( $\text{CDCl}_3$ ):  $\delta$  4.49-4.41 (m, 2H), 4.36-4.18 (m, 6H), 2.14 (s, 3H), 1.973 (dd,  $^3J_{\text{HP}} = 15.4$ ,  $^3J_{\text{HP}'} = 17.0$ ) and 1.965 (dd,  $^3J_{\text{HP}} = 15.5$ ,  $^3J_{\text{HP}'} = 17.0$ , 3H), 1.41-1.34 (m, 12H).  $^{13}\text{C}$  NMR ( $\text{CDCl}_3$ )  $\delta$  168.91 (dd,  $^3J_{\text{CP}} = 7.8$ ,  $^3J_{\text{CP}'} = 8.9$ ), 168.76 (dd,  $^3J_{\text{CP}} = 7.0$ ,  $^3J_{\text{CP}'} = 8.8$ ), 147.67 (d,  $^3J_{\text{CP}} = 7.0$ ), 147.66 (d,  $^3J_{\text{CP}} = 7.3$ ), 147.59 (d,  $^3J_{\text{CP}} = 7.3$ ), 78.79 (dd,  $^1J_{\text{CP}} = 156.1$ ,  $^1J_{\text{CP}'} = 157.4$ ), 78.71 (dd,  $^1J_{\text{CP}} = 155.2$ ,  $^1J_{\text{CP}'} = 159.5$ ), 66.27 (d,  $^2J_{\text{CP}} = 7.6$ ), 66.14 (d,  $^3J_{\text{CP}} = 7.6$ ), 65.82, 65.81, 64.33 (d,  $^4J_{\text{CP}} = 6.9$ ), 64.29 (d,  $^4J_{\text{CP}} = 7.0$ ), 64.23 (d,  $^4J_{\text{CP}} = 7.2$ ), 63.91 (d,  $^4J_{\text{CP}} = 7.5$ ), 21.26, 21.24, 18.61 (t,  $^2J_{\text{CP}} = 2.8$ ), 18.18 (t,  $^2J_{\text{CP}} = 2.0$ ), 16.44 (d,  $^5J_{\text{CP}} = 1.8$ ), 16.39 (d,  $^5J_{\text{CP}} = 2.6$ ), 16.39 (d,  $^5J_{\text{CP}} = 2.6$ ), 16.34 (d,  $^5J_{\text{CP}} = 2.6$ ), 15.99 (d,  $^4J_{\text{CP}} = 6.7$ ), 13.98, 13.97.  $^{31}\text{P}$  NMR ( $\text{CDCl}_3$ )  $\delta$  13.19 d ( $^2J_{\text{PP}} = 22.5$ ) 10.28 and 13.12 d ( $^2J_{\text{PP}} = 21.0$ ) 10.23 d. ESI-MS: 515.3 (M + Na; 100%).

**Typical example of 1a degradation experiment:** Compound **1a** (70.5 mg, 0.143 mmol) was dissolved in MeOH (2 ml), 40% NaOH (58  $\mu\text{l}$ , 4 eq) was added and the reaction mixture was stirred for 0.5 h at room temperature. Reaction mixture was evaporated to dryness and dried in vacuo. Product (ca. 63 mg) was obtained as white powder and contained mixture of acetate and phosphites **2-4** as identified from  $^1\text{H}$  and  $^{31}\text{P}$  NMR spectra (see pages S12-13).

**Typical example of 1b degradation experiment:** Compound **1b** (50 mg) was dissolved in  $\text{H}_2\text{O}$  (1 ml), pH was adjusted to  $\geq 11$  with 6 M NaOH (this needed only 1 pasteur pipette drop) and the reaction mixture was stirred for 1 h at room temperature before evaporating it to dryness in vacuo. Product was obtained as white powder and contained mixture of acetate and phosphite **4** as

identified from  $^1\text{H}$  and  $^{31}\text{P}$  NMR spectra (see pages S14-15; in  $^{31}\text{P}$  NMR spectrum the remaining *H-P* coupling can be seen because of insufficient decoupling power).

**Typical example of 1b degradation experiment in triethyl amine:** Compound **1b** (50 mg) was dissolved in  $\text{H}_2\text{O}$  (1 ml), triethyl amine (122  $\mu\text{l}$ , 5 eq) was added and the reaction mixture was stirred for 1 h at 60  $^\circ\text{C}$  before evaporating it to dryness in vacuo. Product was obtained as slightly yellow solid and contained mixture of acetylphosphonate **7** and phosphite **3** as identified from  $^1\text{H}$  and  $^{31}\text{P}$  NMR spectra (see pages S16-17; in  $^{31}\text{P}$  NMR spectrum the remaining *H-P* coupling can be seen for the compound **3** because of insufficient decoupling power).

Compound 1a

PT/MS-170205-3 cdcl3 tms

<sup>1</sup>H NMR spectrum

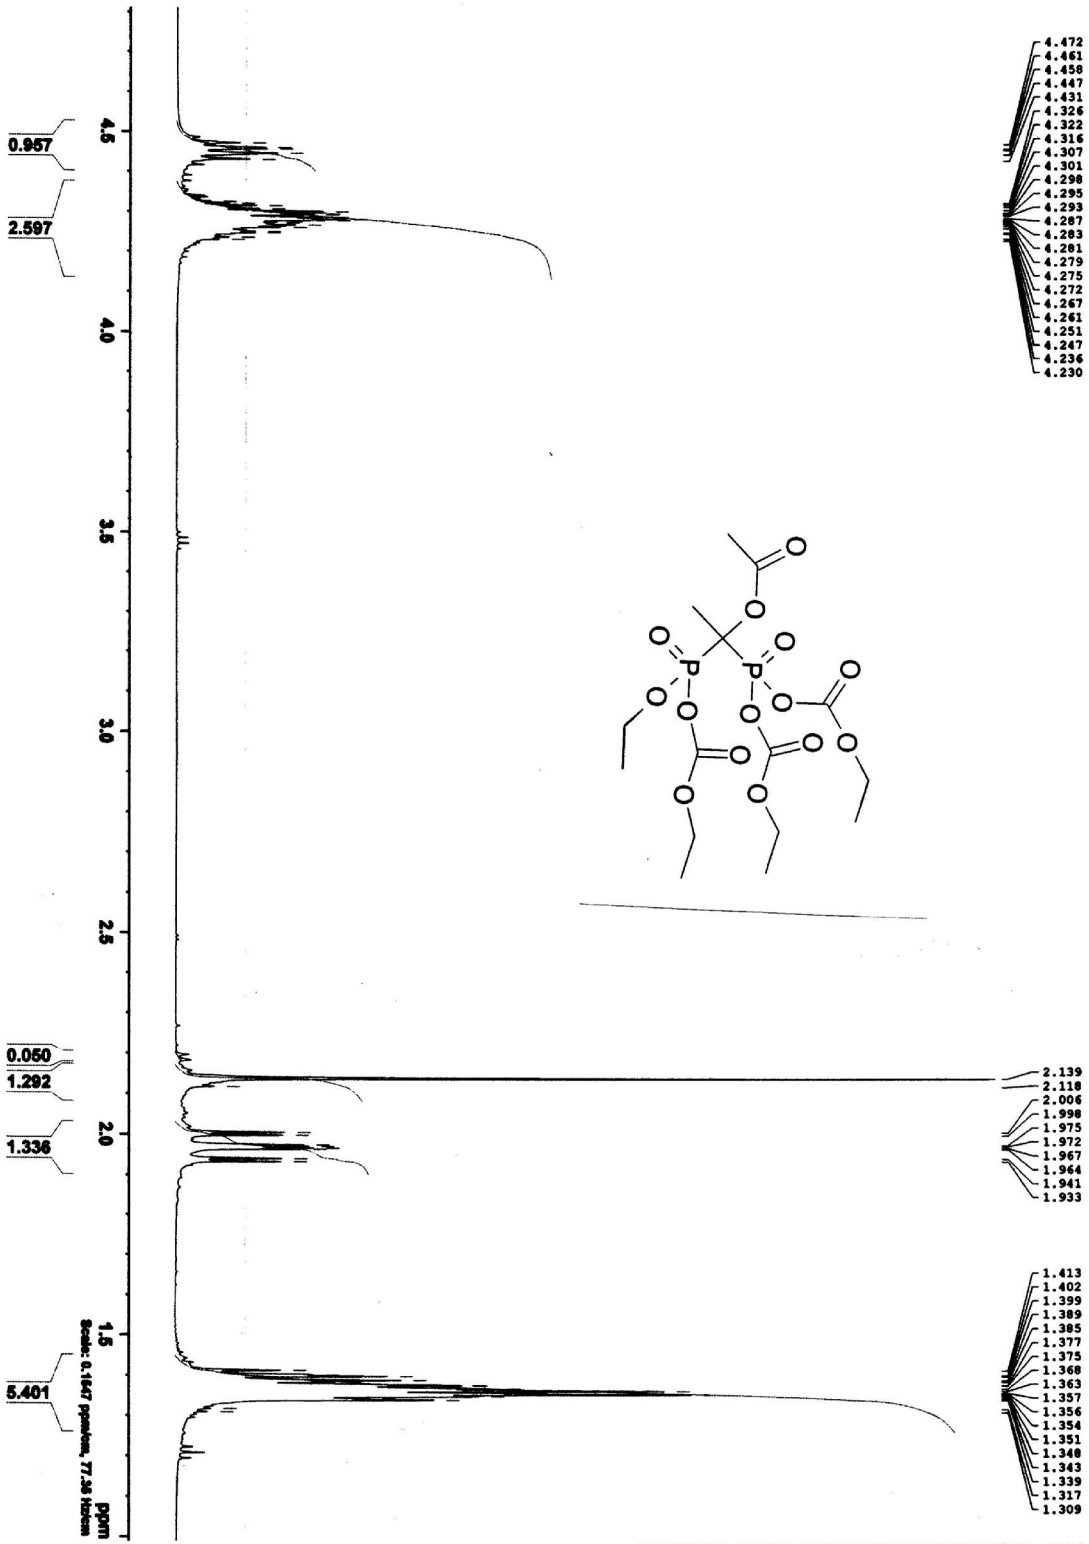

Current Data Parameters  
 Name: PT-170205-3  
 ExpNO: 1  
 F2 - Acquisition Parameters  
 Date\_Time: 20050218 11:24  
 Instrument: spect  
 Processor: FULMOS  
 F2 - Processing Parameters  
 File: 500.1300000  
 F2: 500.1300000 MHz  
 SFO1: 500.1300100 MHz  
 CHANNEL: f1 1H  
 P1: 9.30 usec  
 PL1: 0.00 dB  
 SFO2: 500.1300100 MHz  
 F2 - Processing Parameters  
 File: 500.1300000  
 F2: 500.1300000 MHz  
 SFO1: 500.1300100 MHz  
 CHANNEL: f1 1H  
 P1: 9.30 usec  
 PL1: 0.00 dB  
 SFO2: 500.1300100 MHz

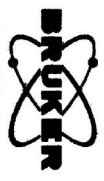

Compound 1a

PTMMS-170205-3 cdcl3 tms

31P NMR spectrum

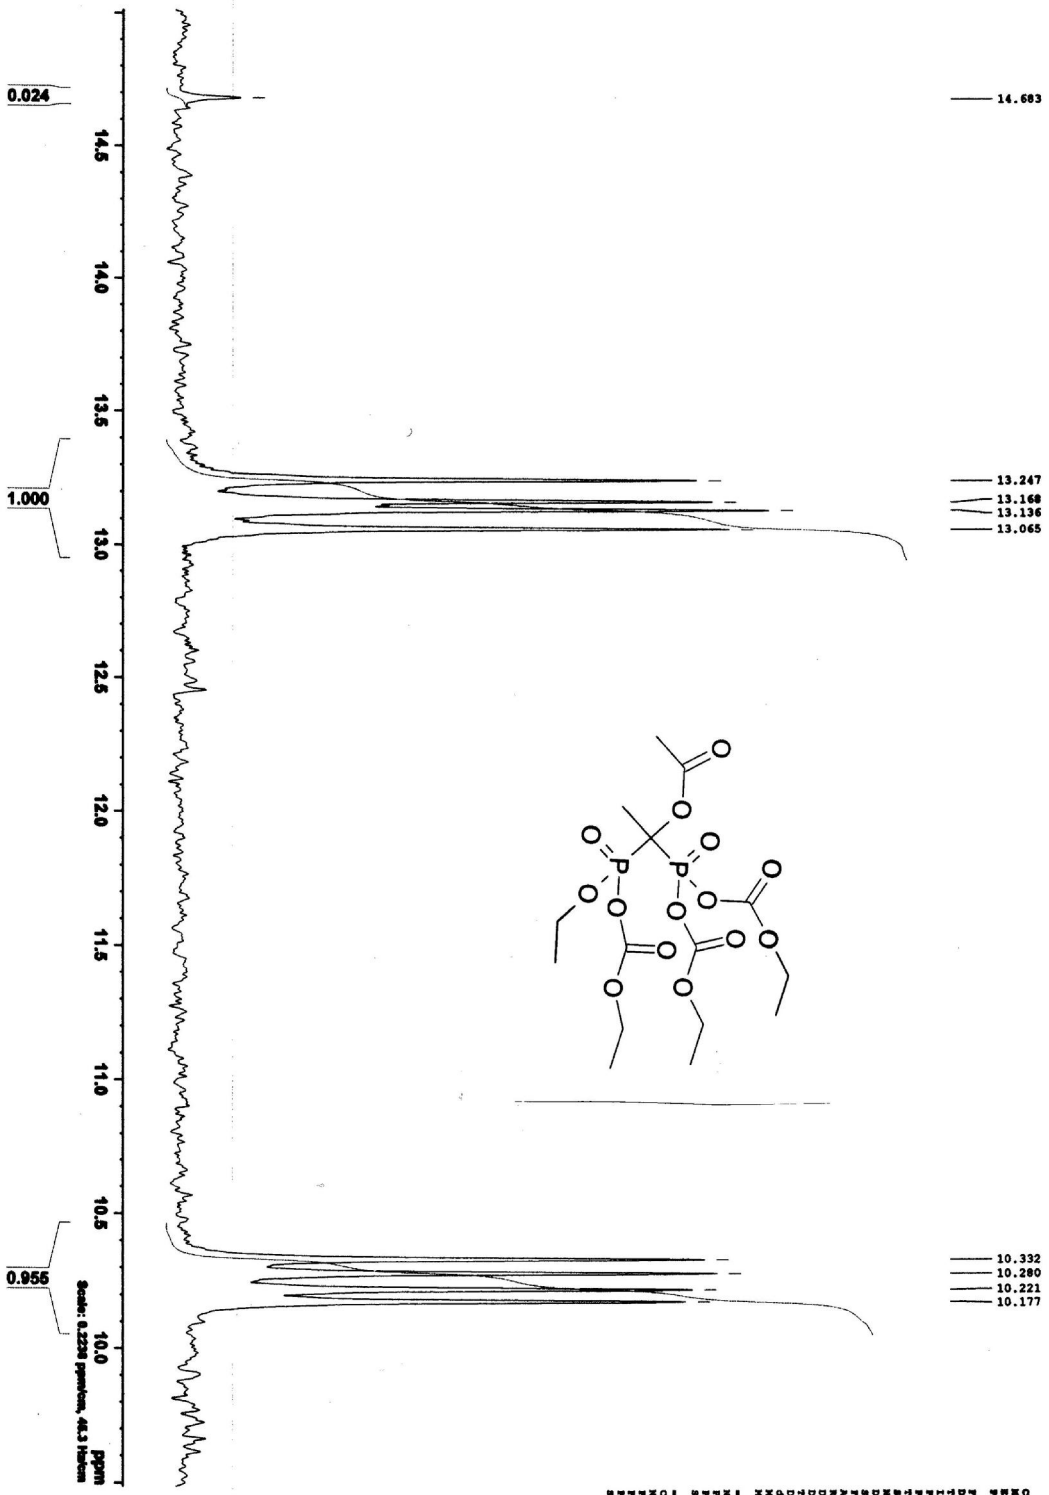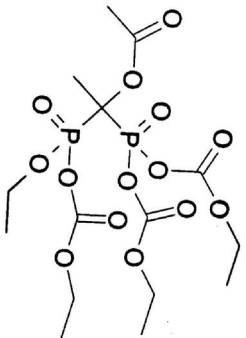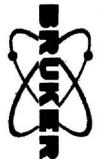

Current Data Parameters  
Name PTMMS-170205-3  
EXPNO 1  
PROCNO 1

F2 - Acquisition Parameters  
Date\_ Time 20071123 11:23  
INSTRUM spect  
PROBHD 5 mm QNP 1H/2  
PULPROG zgpg30  
TD 32768  
SFO 400.146400  
AQ 3.00  
RG 320  
DE 0.000000  
FIDRES 0.224052 Hz  
AQ 0.4031087 sec  
RG 12.500  
DE 5.00 usec  
TE 300.2 K  
D1 2.0000000 sec  
d11 0.0300000 sec  
MORPH 0.0000000 sec  
MORPH 0.0000000 sec

===== CHANNEL f1 31P =====  
NUC1 31P 6.00 usec  
P1 1.00 usec  
PL1 202.454830 dB  
SFO 125.761154 MHz

===== CHANNEL f2 1H =====  
CHRGMS 1H  
NUC2 1H 4.00 usec  
PCPD2 19.00 usec  
PL2 19.00 dB  
SFO2 500.132507 MHz

Compound 1a

PTMMS-170206-3 cdCl3 rms

<sup>13</sup>C NMR spectrum

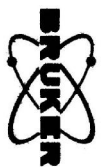

168.995  
168.933  
168.925  
168.862  
168.837  
168.782  
168.767  
168.711

147.710  
147.650  
147.632  
147.574

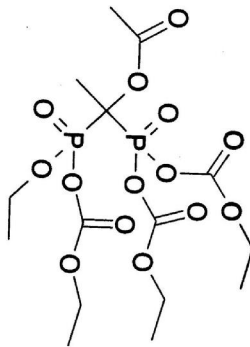

80.061  
79.980  
78.822  
78.806  
78.752  
78.711  
77.617  
77.568  
77.479  
77.426  
77.419  
77.299  
77.249  
77.156  
77.045  
76.791  
76.598  
76.558  
76.541  
68.296  
66.311  
66.251  
66.169  
66.110  
65.966  
65.859  
65.820  
65.811  
64.365  
64.328  
64.310  
64.267  
64.209  
63.956  
63.898  
63.784  
21.260  
21.238  
18.642  
18.621  
18.600  
18.198  
18.180  
18.160  
16.449  
16.428  
16.404  
16.383  
16.358  
16.337

170 160 150 140 130 120 110 100 90 80 70 60 50 40 30 20 10 ppm

```

Current Data Parameters
NAME      MS-170205-3
EXPNO    3
PROCNO   1
F2 - Acquisition Parameters
Date_    20050223
Time     14.41
INSTRUM  spect
PROBHD   5 mm QNP 1H/13
PULPROG  zgpg30
TD        65536
SOLVENT  CDCl3
NS        4504
DS        0
SWH       30303.031 Hz
FIDRES    0.231194 Hz
AQ        2.1827132 sec
RG         6132
DM        16.500 usec
DE        6.00 usec
TE        300.0 K
D1        12.00000000 sec
d11       0.20000000 sec
DELTA     0.20000000 sec
MAGNET    0.15000000 sec
MCPRX     0.01500000 sec

===== CHANNEL F1 =====
NUC1      13C
P1        8.00 usec
PL1       0.00 dB
SFO1     125.7715724 MHz

===== CHANNEL F2 =====
CPDPRG2   waltz16
NUC2      31P
P2        90.00 usec
PL2       19.00 dB
PL12      19.00 dB
SFO2     500.1330885 MHz

F2 - Processing parameters
SI        32768
SF        125.757872 MHz
WDW       EM
SSB       0
LB        0.25 Hz
GB        0
PC        0.65
    
```

Compound 1a

PTMMS-170205-3 cdcl3 tms

<sup>13</sup>C NMR spectrum

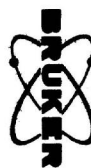

- 168.995
- 168.933
- 168.925
- 168.862
- 168.837
- 168.782
- 168.767
- 168.711

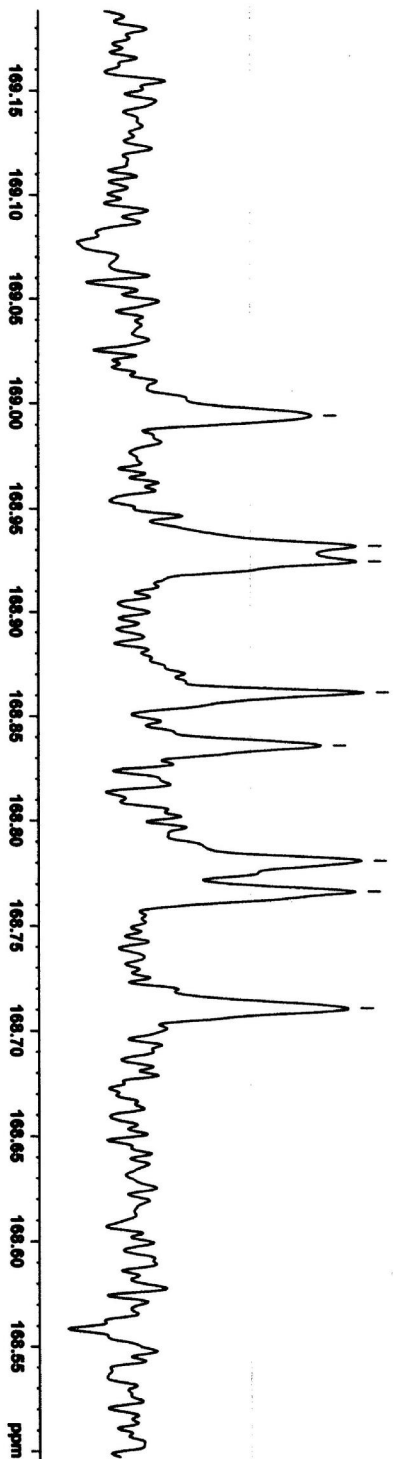

```

Current Data Parameters
NAME MS-170205-3
EXPNO 3
PROCNO 1
F2 - Acquisition Parameters
Date_ 20050223
Time 14.41
INSTRUM spect
PROBHD 5 mm QNP 1H/13
PULPROG zgpg30
TD 131072
SOLVENT CDCl3
NS 4504
DS 0
SHE 3033.064 Hz
FIDRES 0.231194 Hz
AQ 2.1627546 sec
RG 8192
AQ 16.500 usec
DE 6.00 usec
TE 300.2 K
NUC1 13C
NUC2 1H
PCPD2 90.00 usec
PZ2 19.00 dB
F12 13.00 dB
SFO1 500.133085 MHz
F2 - Processing parameters
SI 524288
SF 125.757872 MHz
WDW EM
SSB 0
GB 0
PC 0.65
CHANNEL F1
NUC1 13C
P1 8.00 usec
PL1 8.00 dB
SFO1 125.7715724 MHz
CHANNEL F2
NUC2 1H
P2 90.00 usec
PL2 19.00 dB
SFO2 500.133085 MHz
  
```

Compound 1a

PT/MS-170205-3 cdcl3 tms

<sup>13</sup>C NMR spectrum

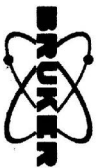

147.710  
147.707

147.654  
147.650

147.632

147.574

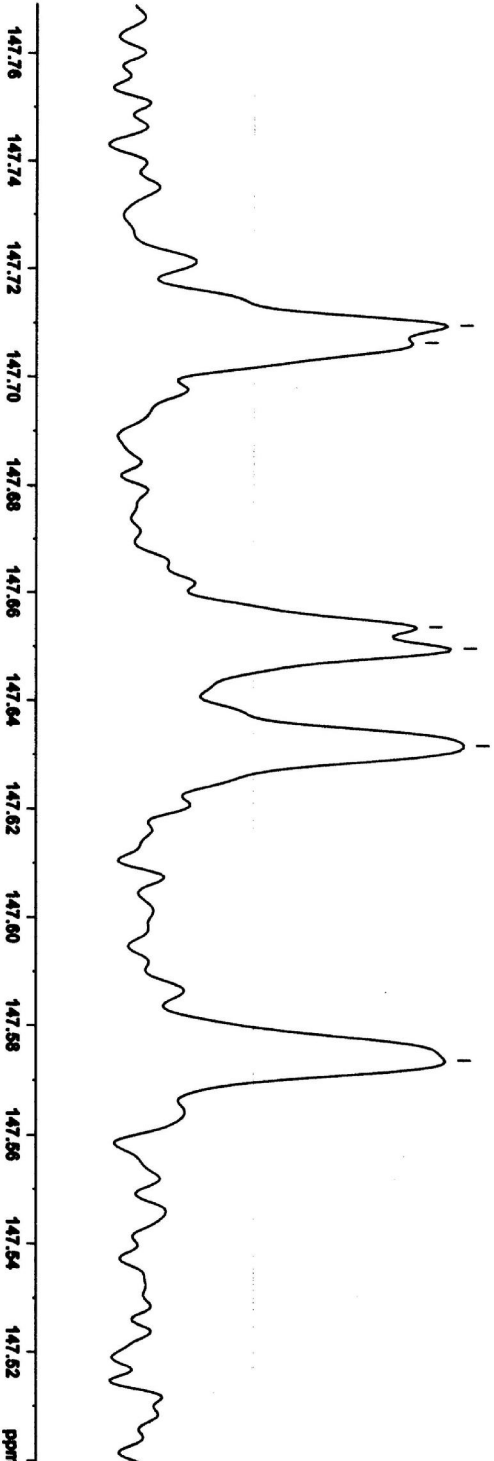

Current Data Parameters  
NAME MS-170205-3  
EXTNO 3  
PROCNO 1

F2 - Acquisition Parameters

Date\_ 2005/2/3  
Time 11:41  
INSTRUM spect  
PROBHD 5 mm QNP 1H/13  
PULPROG zgpg30  
TD 131072  
SOLVENT CDCl3  
NS 4504  
DS 4  
SWH 3030.031 Hz  
FIDRES 0.231194 Hz  
AQ 2.1627545 sec  
RG 8192  
DW 16.500 usec  
DE 390.0 usec  
TE 300.2 K  
D1 12.00000000 sec  
d11 0.03000000 sec  
MCREST 0.00000000 sec  
MCNMR 0.01500000 sec

CHANNEL f1

NUC1 <sup>13</sup>C  
P1 8.00 usec  
PL1 8.00 dB  
SFO1 125.7517872 MHz

CHANNEL f2

CPDPRG2 waltz16  
NUC2 <sup>1</sup>H  
PCPD2 90.00 usec  
PL2 19.00 dB  
PL12 19.00 dB  
SFO2 500.1350885 MHz  
F2 - Processing parameters  
SI 524286  
SF 125.7517872 MHz  
WDW EM  
SSB 0  
GB 0.25 Hz  
AS 0  
PC 0.01



Compound 1a

PT/MS-170205-3 cdcl3 tms

<sup>13</sup>C NMR spectrum

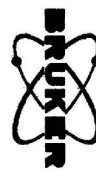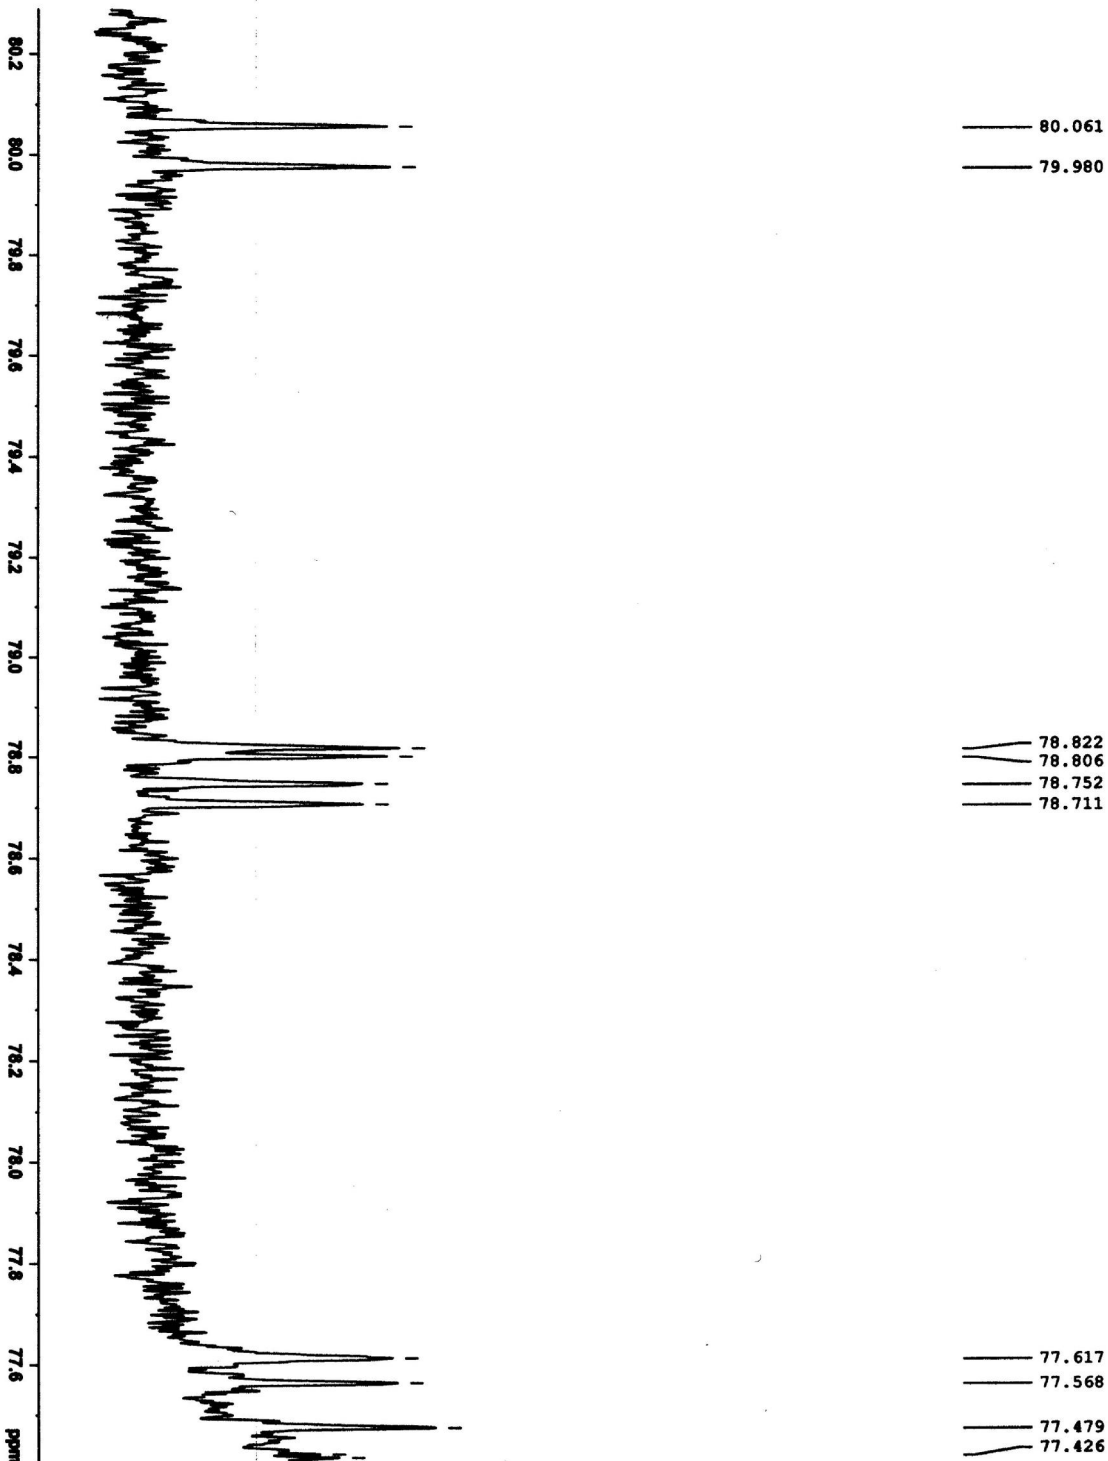

Current Data Parameters  
 NAME MS-170205-3  
 EXPTNO 3  
 PROCNO 1  
 F2 - Acquisition Parameters  
 Date\_ 20090223  
 Time\_ 14:44  
 INSTRUM spect  
 PROCBD 5 mm QNP 1H/13  
 PULPROG zgpg30  
 TD 131072  
 SFO100 131.072  
 SOLVENT CDCl3  
 NS 4504  
 DS 4  
 SFR 3030.031 Hz  
 FIDRES 0.231194 Hz  
 AQ 2.1627545 sec  
 RG 8192  
 TM 16.500 usec  
 DE 3.00 usec  
 TE 300.0 K  
 D1 12.00000000 sec  
 d11 0.03000000 sec  
 ACQRES 0.00000000 sec  
 MCNMR 0.01500000 sec  
 CHANNEL F1 13C  
 NU1 6.00 usec  
 PL 8.00 dB  
 SFO1 125.7715724 MHz  
 CHANNEL F2 1H  
 CPDPRG2 waltz16  
 NU2 90.00 usec  
 PCPD2 19.00 dB  
 PL2 19.00 dB  
 SFO2 500.1350885 MHz  
 F2 - Processing parameters  
 SI 524298  
 SF 125.7577872 MHz  
 NDW 0  
 SSB 0  
 DB 0.25 Hz  
 GC 0.65

Compound 1a

PT/MS-170205-3 cdcl3 tms

<sup>13</sup>C NMR spectrum

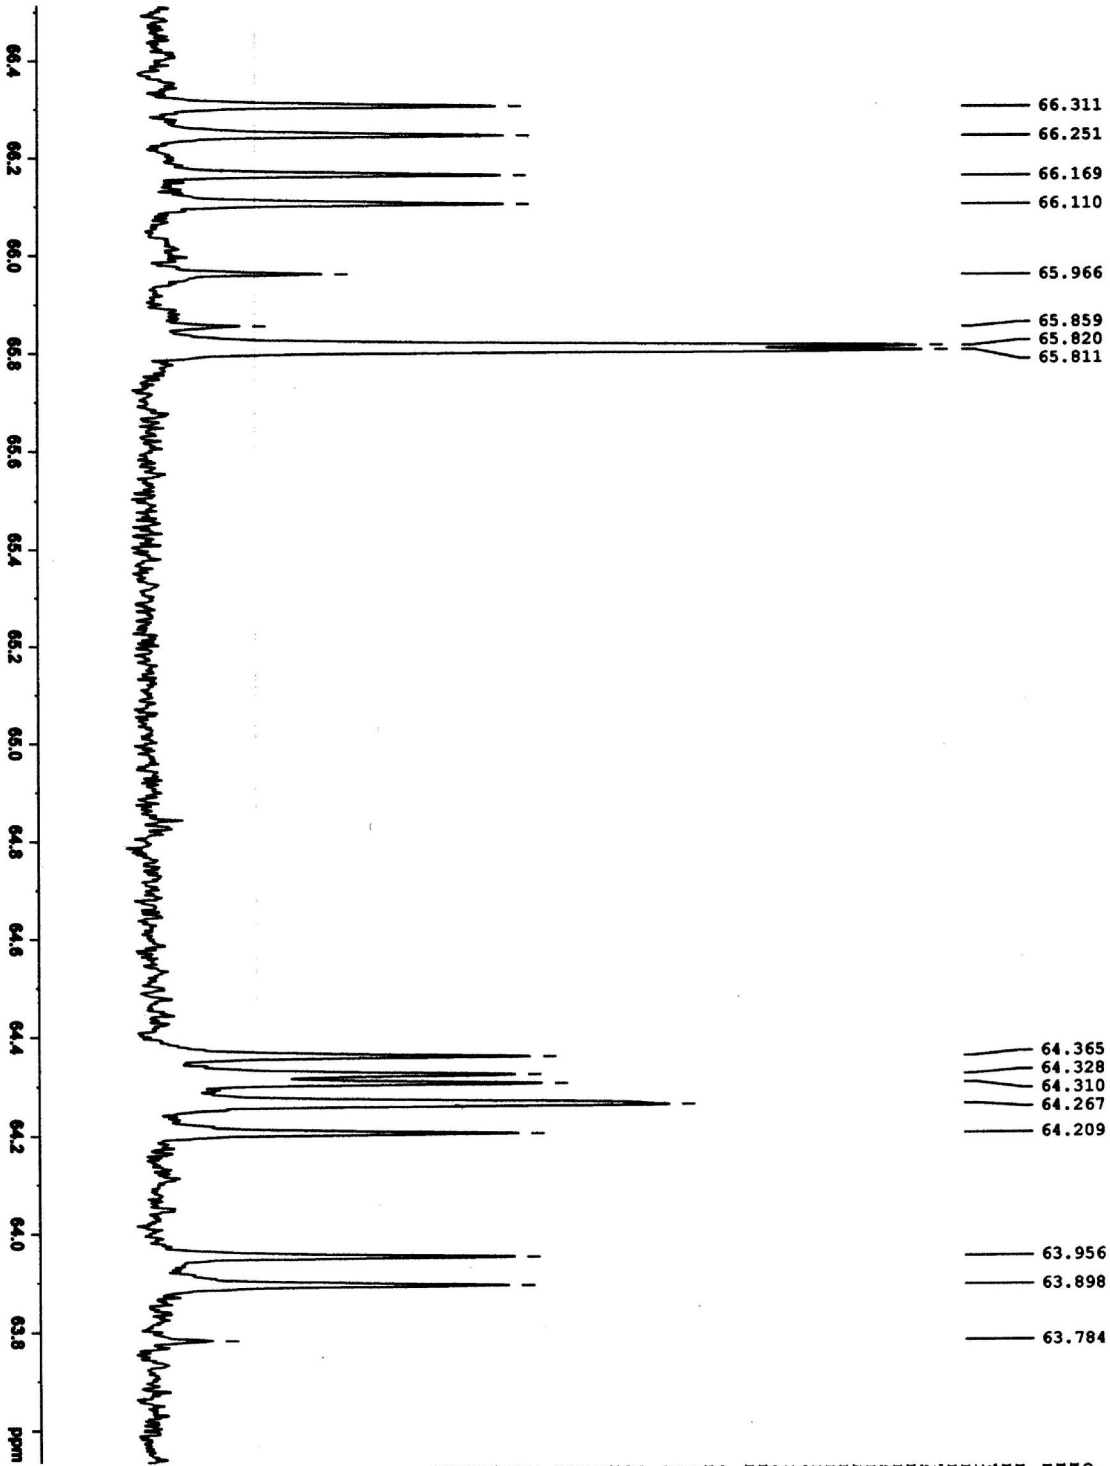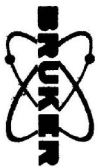

```

Current Data Parameters
NAME      MS-170205-3
EXPNO    3
PROCNO   1

F2 - Acquisition Parameters
Date_    20050223
Time     14.41
INSTRUM  spect
PROBHD   5 mm QNP 1H/13
PULPROG  zgpg30
TD       131072
SOLVENT  CDCl3
NS       4504
DS       0
SWH      30303.031 Hz
FIDRES   0.231194 Hz
AQ       2.182185 sec
RG       16.500 usec
DE       6.00 usec
TE       300.0 K
D1       12.00000000 sec
d11      0.03000000 sec
d12      0.03000000 sec
d13      0.03000000 sec
d14      0.03000000 sec
d15      0.03000000 sec
d16      0.03000000 sec
d17      0.03000000 sec
d18      0.03000000 sec
d19      0.03000000 sec
d20      0.03000000 sec
d21      0.03000000 sec
d22      0.03000000 sec
d23      0.03000000 sec
d24      0.03000000 sec
d25      0.03000000 sec
d26      0.03000000 sec
d27      0.03000000 sec
d28      0.03000000 sec
d29      0.03000000 sec
d30      0.03000000 sec
d31      0.03000000 sec
d32      0.03000000 sec
d33      0.03000000 sec
d34      0.03000000 sec
d35      0.03000000 sec
d36      0.03000000 sec
d37      0.03000000 sec
d38      0.03000000 sec
d39      0.03000000 sec
d40      0.03000000 sec
d41      0.03000000 sec
d42      0.03000000 sec
d43      0.03000000 sec
d44      0.03000000 sec
d45      0.03000000 sec
d46      0.03000000 sec
d47      0.03000000 sec
d48      0.03000000 sec
d49      0.03000000 sec
d50      0.03000000 sec
d51      0.03000000 sec
d52      0.03000000 sec
d53      0.03000000 sec
d54      0.03000000 sec
d55      0.03000000 sec
d56      0.03000000 sec
d57      0.03000000 sec
d58      0.03000000 sec
d59      0.03000000 sec
d60      0.03000000 sec
d61      0.03000000 sec
d62      0.03000000 sec
d63      0.03000000 sec
d64      0.03000000 sec
d65      0.03000000 sec
d66      0.03000000 sec
d67      0.03000000 sec
d68      0.03000000 sec
d69      0.03000000 sec
d70      0.03000000 sec
d71      0.03000000 sec
d72      0.03000000 sec
d73      0.03000000 sec
d74      0.03000000 sec
d75      0.03000000 sec
d76      0.03000000 sec
d77      0.03000000 sec
d78      0.03000000 sec
d79      0.03000000 sec
d80      0.03000000 sec
d81      0.03000000 sec
d82      0.03000000 sec
d83      0.03000000 sec
d84      0.03000000 sec
d85      0.03000000 sec
d86      0.03000000 sec
d87      0.03000000 sec
d88      0.03000000 sec
d89      0.03000000 sec
d90      0.03000000 sec
d91      0.03000000 sec
d92      0.03000000 sec
d93      0.03000000 sec
d94      0.03000000 sec
d95      0.03000000 sec
d96      0.03000000 sec
d97      0.03000000 sec
d98      0.03000000 sec
d99      0.03000000 sec
d100     0.03000000 sec

===== CHANNEL f1 =====
NUC1     13C
P1       8.00 usec
PL1      0.00 dB
SFO1     125.7715724 MHz

===== CHANNEL f2 =====
CPDPRG2  waltz16
NUC2     1H
P2       90.00 usec
PL2      0.00 dB
PL12     19.00 dB
PL13     19.00 dB
SFO2     500.1330685 MHz

F2 - Processing parameters
SI       324288
SF       125.7577872 MHz
WDW      EM
SSB      0
GB       0
PC       0.65
    
```

Compound 1a

PTMS-170205-3 cdcl3 tms

<sup>13</sup>C NMR spectrum

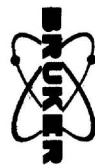

21.260  
21.238

18.642  
18.621  
18.600

18.198  
18.180  
18.160

16.449  
16.428  
16.404  
16.383  
16.358  
16.337  
16.022  
15.969

15.286

13.981  
13.970  
13.931

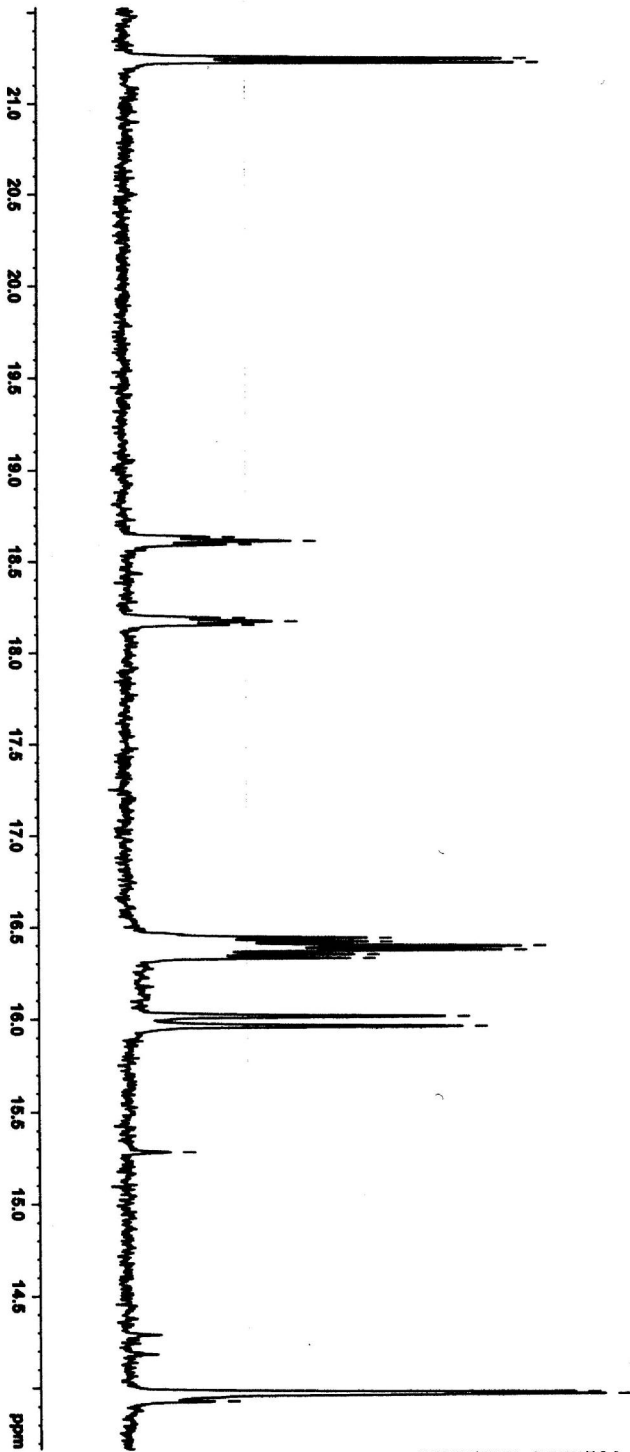

```

Current Data Parameters
NAME      MS-170205-3
EXPNO     1
PROCNO    1
F2 - Acquisition Parameters
Date_     20050223
Time      14.41
INSTRUM   spect
PROBHD    5 mm QNP 1H/13
PULPROG   zgpg
TD         131072
SOLVENT   CDCl3
NS         4504
DS         4
SWH        3030.031 Hz
FIDRES    0.231194 Hz
AQ         2.1627145 sec
RG         1632
DE         1.64320 usec
TE         300.0 K
D1         12.00000000 sec
d11        0.03000000 sec
DELTA     0.03000000 sec
ACQRES    0.01500000 sec
MORPH     0.01500000 sec

CHANNEL F1 -----
NUC1       13C
P1         8.00 usec
PL1        0.00 dB
SFO1       125.7715724 MHz

CHANNEL F2 -----
GEORG2    waltz16
NUC2       13C
PCPD2     90.00 usec
PL2        19.00 dB
PL12       19.00 dB
SFO2       500.1330885 MHz

F2 - Processing parameters
SI         324288
SF         125.757872 MHz
WDW        EM
SSB        0
GB         0
PC         0.65
    
```



PT/MMS-210205-1 cd3od tms(cdc13)

Typical example of 1a decomposition; 31P NMR spectrum

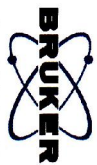

Current Data Parameters  
 NAME: MS-210205-1  
 EXNO: 1  
 EXPCNO: 1  
 F2 - Acquisition Parameters  
 Date\_ Time: 2005-05-25 9:55  
 Type: 1D  
 INSTRUM: spect  
 PROBHD: 5 mm QNP 1H/13  
 PULPROG: zgpg30  
 TD: 32768  
 SOLVENT: D2O  
 NS: 420  
 DS: 4  
 SFO: 125.761  
 SH1: 40000.000 Hz  
 SH2: 125.761 MHz  
 SH3: 40000.000 Hz  
 AQ: 0.403187 sec  
 RG: 9192  
 DE: 12.000 usec  
 TE: 300.2 K  
 FID1: 2.000000000 sec  
 d11: 0.000000000 sec  
 d111: 0.000000000 sec  
 MCKRESF: 0.1300000 sec  
 MCKRESR: 0.1300000 sec  
 ===== CHANNEL F1 =====  
 NUC1: 31P  
 P1: 8.00 usec  
 PL1: 19.00 dB  
 SFO1: 202.489530 MHz  
 ===== CHANNEL F2 =====  
 NUC2: 13C  
 P2: 12.00 usec  
 PL2: 19.00 dB  
 SFO2: 500.132507 MHz

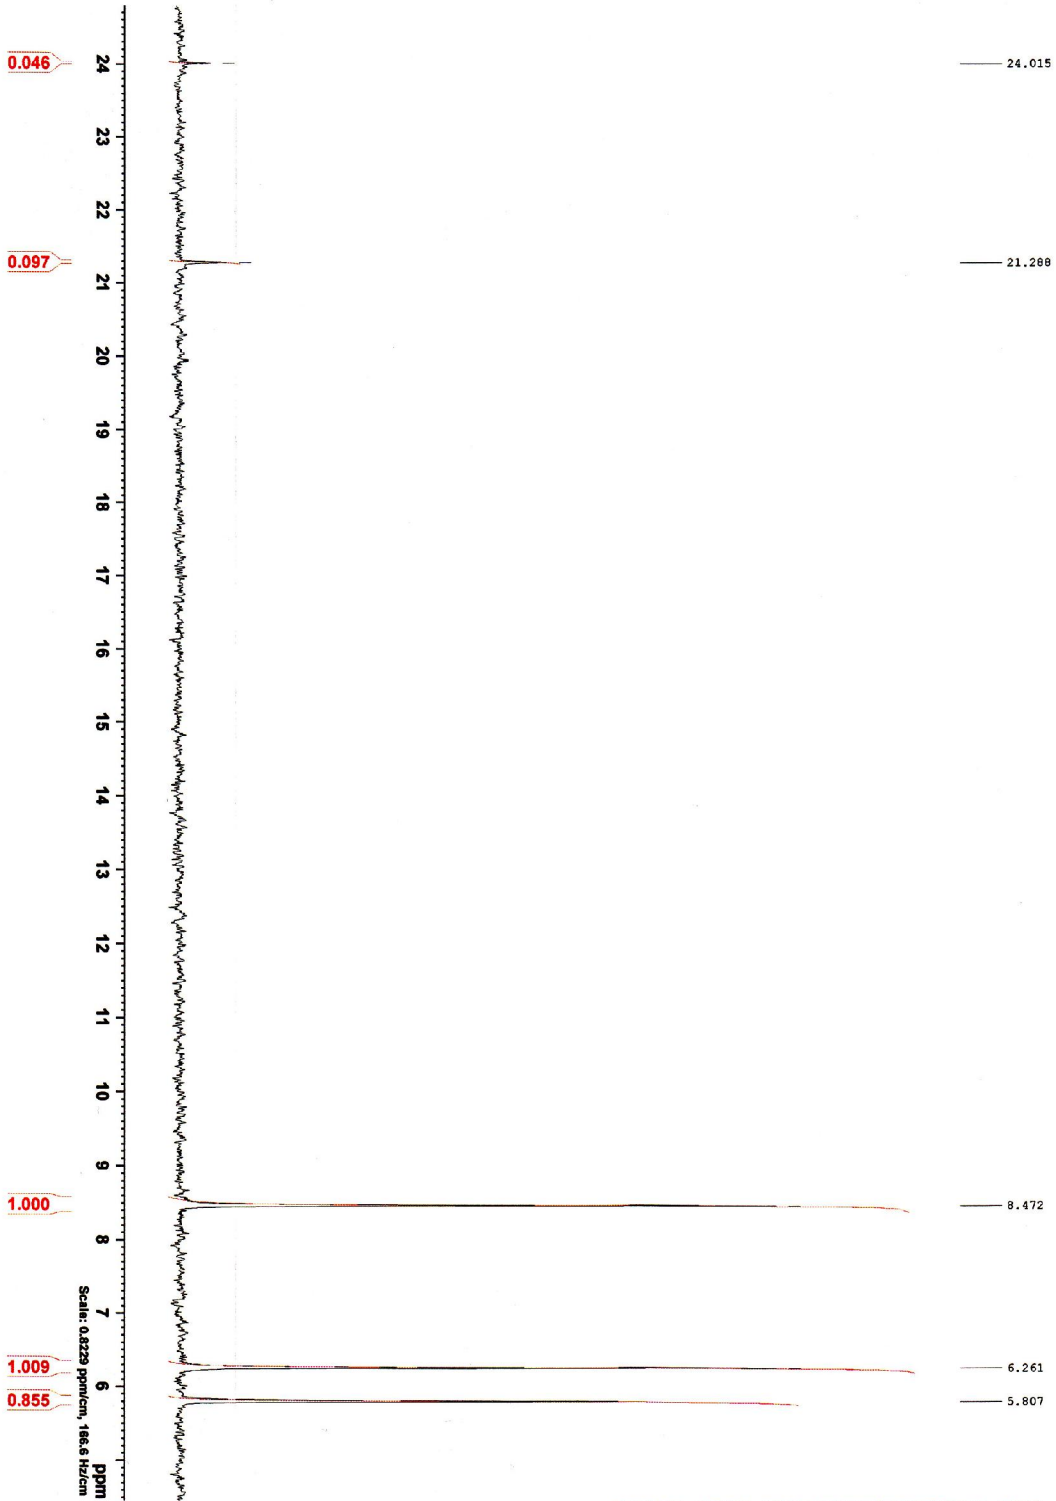

PT/MS-190906-2b d2o

Typical example of 1b decomposition; 1H NMR spectrum

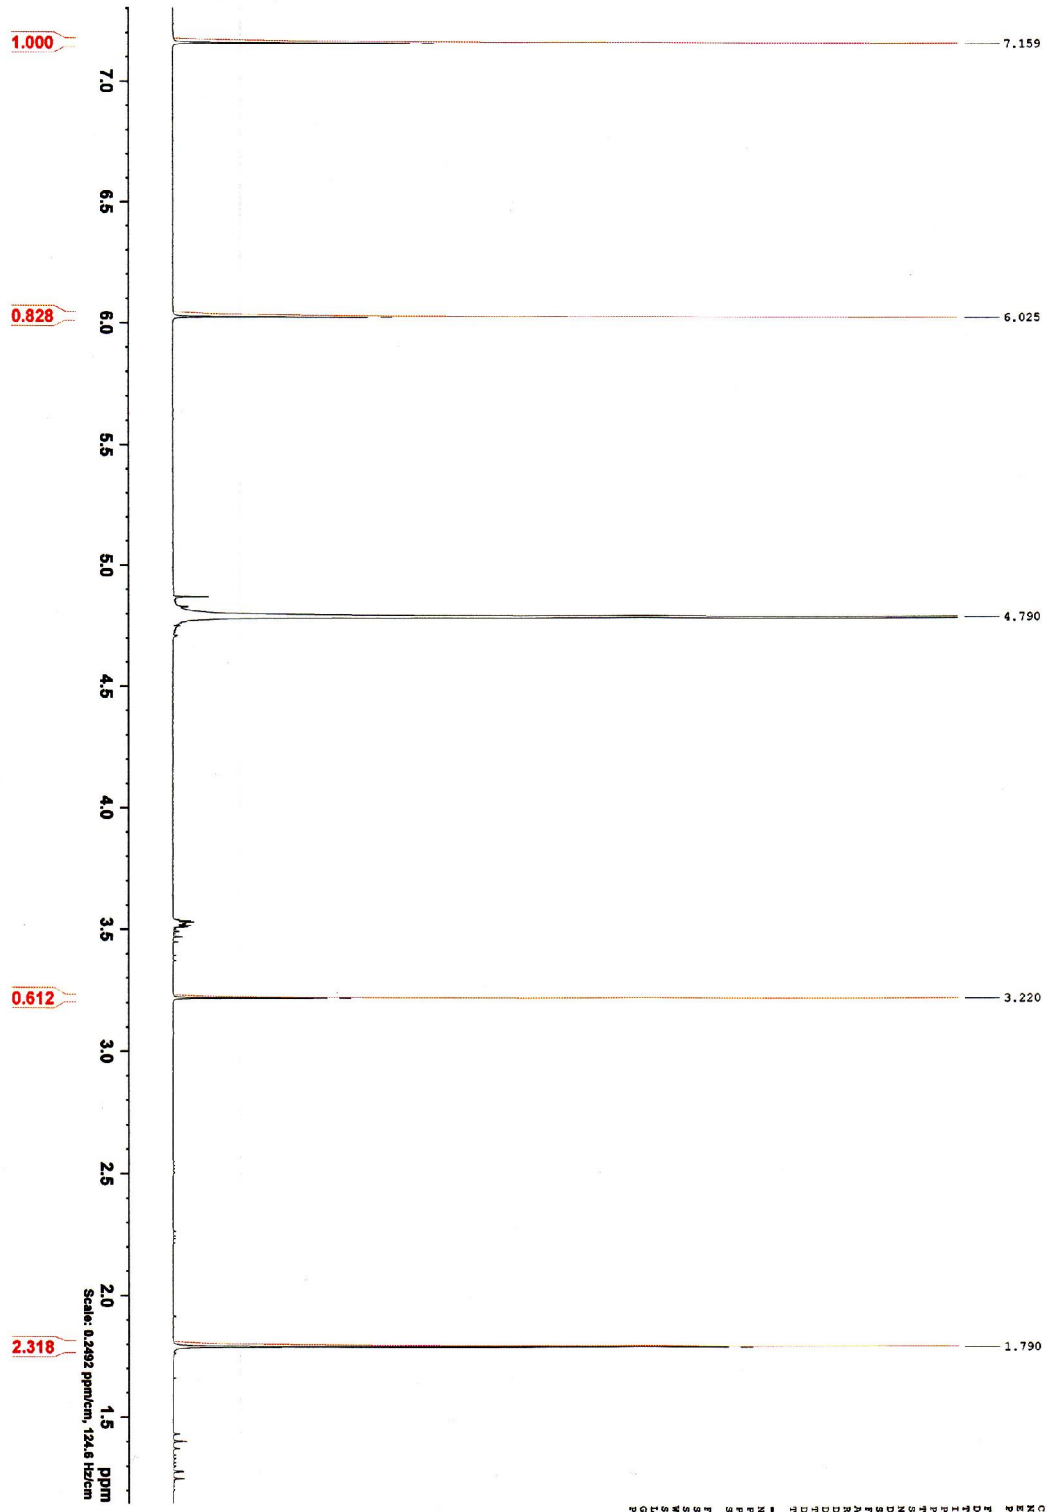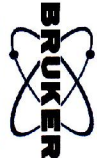

Current Data Parameters  
NAME: MS-190906-2b  
EXNO: 1  
PROCNO: 2  
F2 - Acquisition Parameters  
Date\_ Time: 2001.13.28  
INSTRUM: spect  
PROBHD: 5 mm QNP 1H/2  
PULPROG: zgpg30  
TD: 65536  
SFO: 500.1364518  
AQ: 1.0000000  
RG: 327.680  
DE: 6.00  
TE: 300.2  
D1: 1.5000000  
D11: 0.0500000  
D12: 0.0500000  
D13: 0.0500000  
D14: 0.0500000  
D15: 0.0500000  
D16: 0.0500000  
D17: 0.0500000  
D18: 0.0500000  
D19: 0.0500000  
D20: 0.0500000  
CHANNEL: f1  
NUC1: 1H  
P1: 8.75  
PL1: 0.00  
SFO1: 500.1364518  
F2 - Processing Parameters  
SI: 32768  
SF: 500.1364518  
AQ: 1.0000000  
RG: 327.680  
DE: 6.00  
TE: 300.2  
D1: 1.5000000  
D11: 0.0500000  
D12: 0.0500000  
D13: 0.0500000  
D14: 0.0500000  
D15: 0.0500000  
D16: 0.0500000  
D17: 0.0500000  
D18: 0.0500000  
D19: 0.0500000  
D20: 0.0500000

PTMS-190906-2b d2o Typical example of 1b decomposition; 31P NMR spectrum

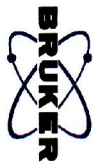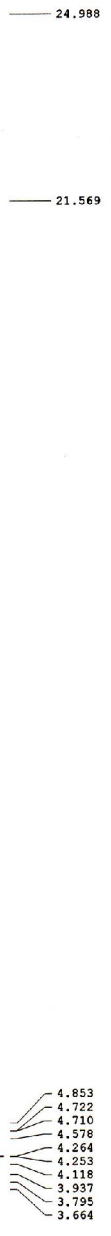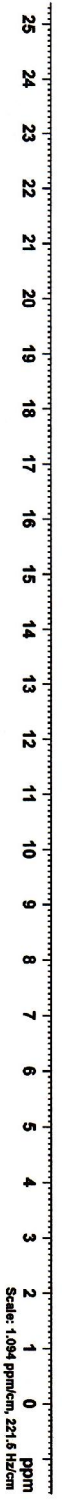

```

=====
Report Date Parameters
NAME MS-190906-2b
EXPTNO 1
PROCNO 1
F2 - Acquisition Parameters
Date_ 20080928
Time 14:28
INSTRUM spect
PROBHD 5 mm QNP 1H/1
PULPROG zgpg30
TD 65536
SOLVENT d2o
NUC1 31P
NUC2 15N
SWH 40830.406 Hz
FIDRES 0.181 Hz
AQ 1.999931 sec
RG 2048
AQ 12.2048 usec
DE 6.00 usec
TE 293.2 K
D1 0.3000000 sec
d11 0.0300000 sec
TDO 1
=====
CHANNEL F1
NUC1 31P
P1 12.00 usec
PL1 0.00 dB
SFO1 202.1586930 MHz
=====
CHANNEL F2
CPDPRG2 waltz16
NUC2 15N
P2 90.00 usec
PL2 24.00 dB
SFO2 500.1325007 MHz
=====
F2 - Processing parameters
    
```

PTMS-190107-1a d2o Typical example of 1b decomposition in triethyl amine; 1H NMR spectrum

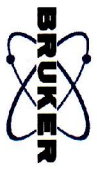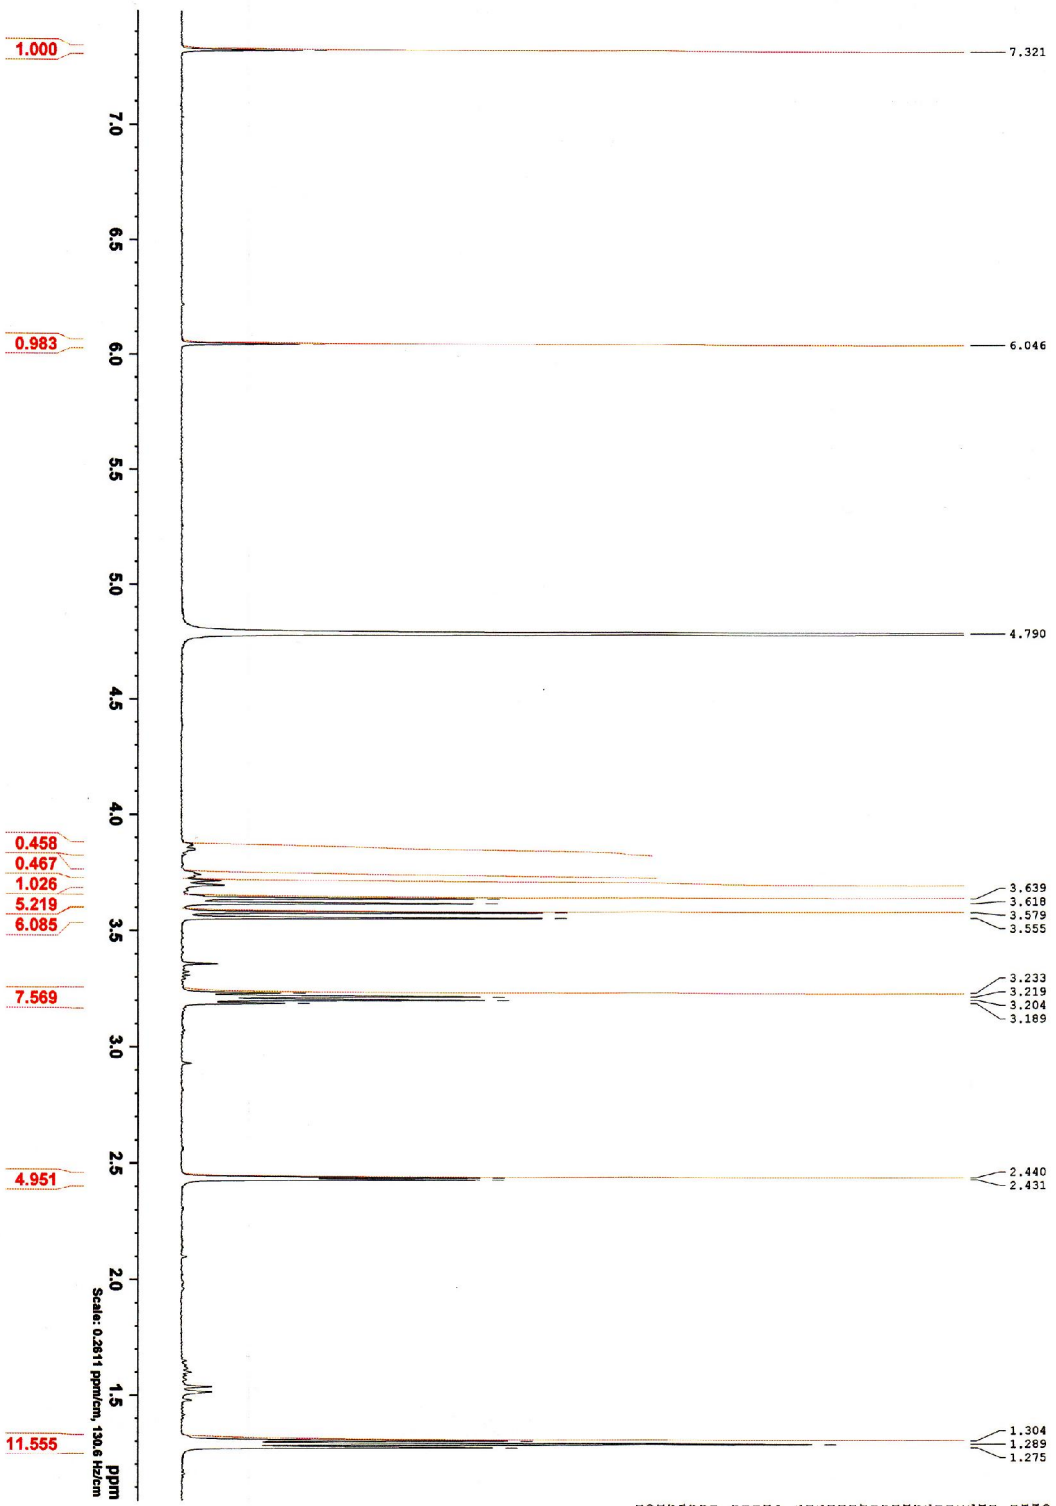

Current Data Parameters  
 Name: PTMS-190107-1a  
 ExpNO: 2  
 PROCNO: 1  
 F2 - Acquisition Parameters  
 Date\_: 2007123  
 Time: 12.43  
 INSTRUM: spect  
 PROBRD: 5 mm QNP 1H/1  
 TD: 65536  
 TO: 65536  
 SOLVENT: D2O  
 NS: 0  
 DS: 0  
 SWH: 10000.000 Hz  
 FIDRES: 0.000000 Hz  
 AQ: 59.64 usec  
 RG: 64  
 DE: 3.2769001 sec  
 TE: 300.2 K  
 T1: 300.0 K  
 T1RHO: 1.50000001 sec  
 T1rho: 1.50000001 sec  
 ===== CHANNEL f1 =====  
 NUCL1: 1H  
 P1: 8.75 usec  
 PL1: 0.00 dB  
 SFO1: 500.1360010 MHz  
 F2 - Processing parameters  
 SI: 32768  
 SF: 500.1360010 MHz  
 SD: 32768  
 SFO: 500.1360010 MHz  
 AS: 0.30 Hz  
 PC: 5.00



PTMS-190107-1a d2o

Typical example of 1b decomposition in triethyl amine; 31P NMR spectrum

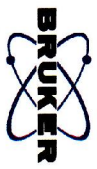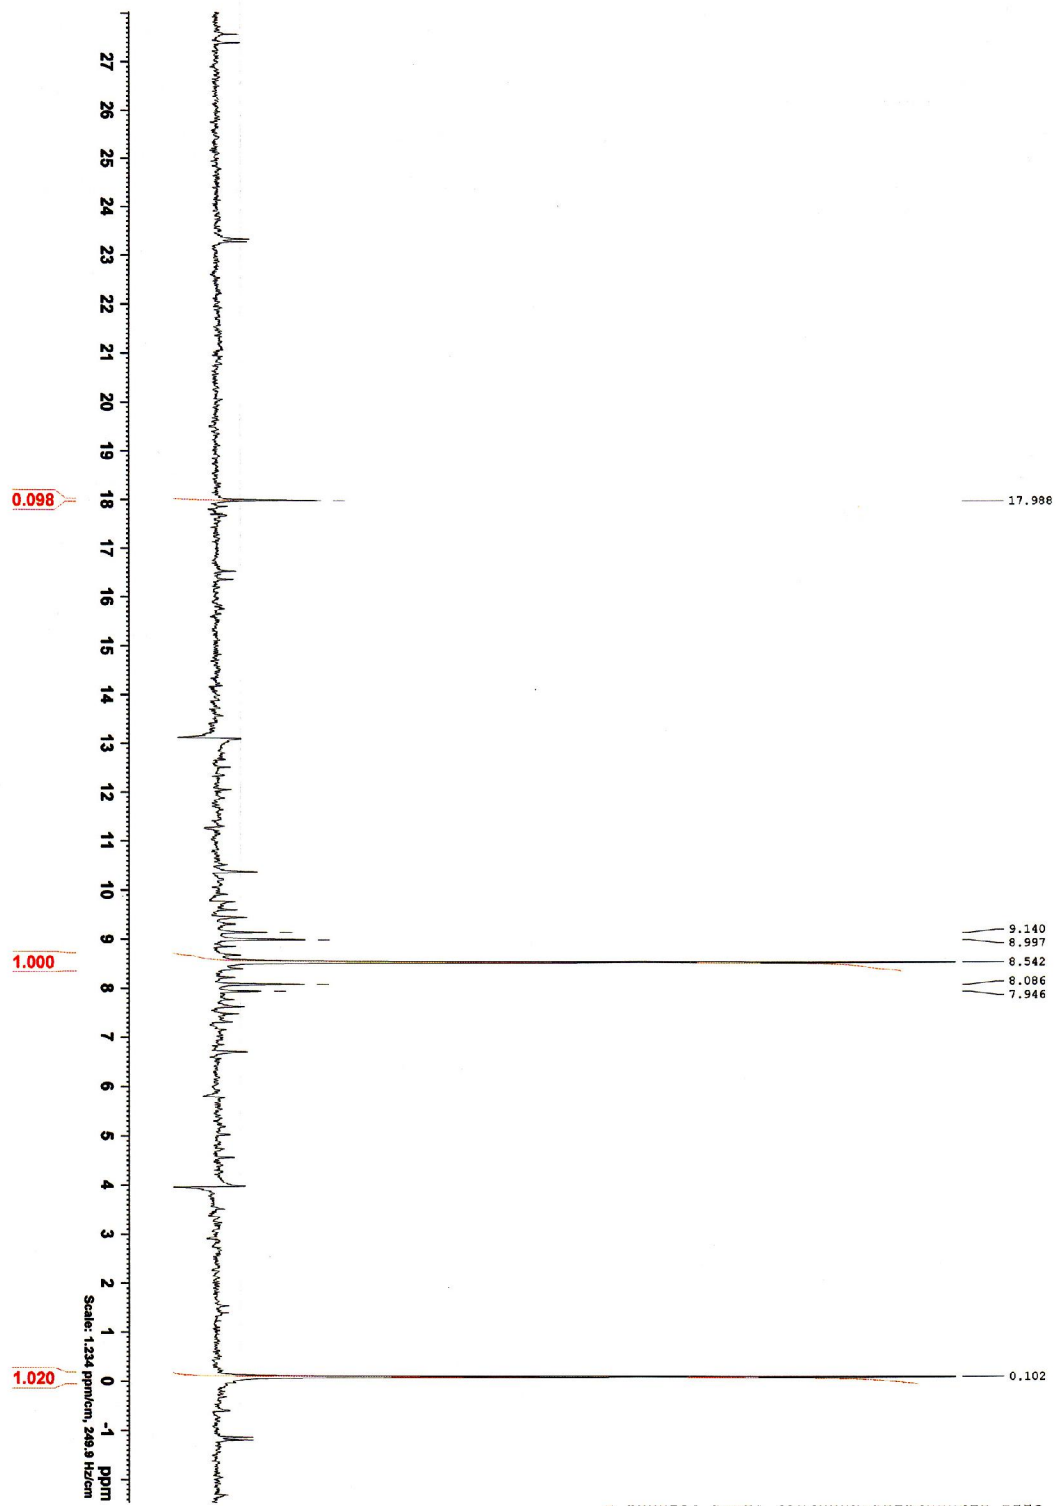

===== CHANNEL F1 =====  
NUC1 31P  
PUL 8  
PL 10.00 dB  
SFO1 202.4586930 MHz  
===== CHANNEL F2 =====  
CPDPRG2 waltz16  
RFRF2 50.00 usec  
PL2 24.00 dB  
SFO2 500.132607 MHz  
===== Processing parameters =====  
Date\_ 2007122  
Time\_ 10.42  
INSTRUM spect  
PROBHD 5 mm QNP 1H/1  
PULPROG zgpg30  
TD 65536  
SOLVENT D2O  
NS 1  
DS 0  
SWH 40650.406 Hz  
FIDRES 0.001351 sec  
AQ 2.048 usec  
RG 2048  
DE 6.00 usec  
TE 300.1 K  
DQ 0.000000 sec  
d11 0.0300000 sec  
TPO 1
